# Supplementary material
Source: PubMed Central journal article supplement (PMC3422493)

# Figure S1

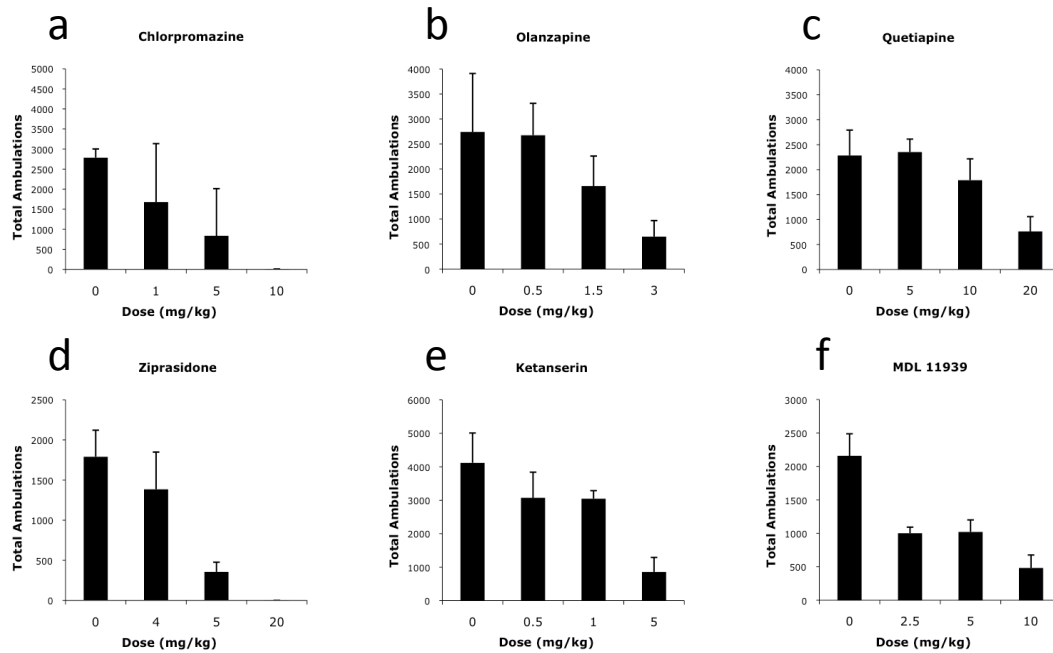

Supplement: npp201281x2.pdf [file npp201281x2.pdf]
